# Supplementary material for: Mixed-Methods Systematic Review to Identify Facilitators and Barriers for Parents/Carers to Engage Pre-School Children in Community-Based Opportunities to Be Physically Active
Source: MDPI journal article supplement (doi:10.3390/children9111727), 2022-11-10
Supplement: s1 [file s1]

## Electronic Supplementary Material Breakdown of the quality assessments and supporting justification

**Table S1.** Coding criteria for the Mixed Methods Assessment Tool.

| Code Breakdown                                                                |                                                                                                    |
|-------------------------------------------------------------------------------|----------------------------------------------------------------------------------------------------|
| Screening questions<br>(For all types, if no, assessment should not continue) | S1. Are there clear research questions?                                                            |
|                                                                               | S2. Do the collected data allow to address the research questions?                                 |
| 1. Qualitative                                                                | 1.1. Is the qualitative approach appropriate to answer the research question?                      |
|                                                                               | 1.2. Are the qualitative data collection methods adequate to address the research question?        |
|                                                                               | 1.3. Are the findings adequately derived from the data?                                            |
|                                                                               | 1.4. Is the interpretation of results sufficiently substantiated by data?                          |
|                                                                               | 1.5. Is there coherence between qualitative data sources, collection, analysis and interpretation? |
| 2. Quantitative randomized controlled trials                                  | 2.1. Is randomization appropriately performed?                                                     |
|                                                                               | 2.2. Are the groups comparable at baseline?                                                        |
|                                                                               | 2.3. Are there complete outcome data?                                                              |
|                                                                               | 2.4. Are outcome assessors blinded to the intervention provided?                                   |
|                                                                               | 2.5. Did the participants adhere to the assigned intervention?                                     |
| 3. Quantitative non-randomized                                                | 3.1. Are the participants representative of the target population?                                 |
|                                                                               | 3.2. Are measurements appropriate regarding both the outcome and intervention (or exposure)?       |
|                                                                               | 3.3. Are there complete outcome data?                                                              |
|                                                                               | 3.4. Are the confounders accounted for in the design and analysis?                                 |
|                                                                               | 3.5. During the study period, is the intervention administered (or exposure occurred) as intended? |
| 4. Quantitative descriptive                                                   | 4.1. Is the sampling strategy relevant to address the research question?                           |
|                                                                               | 4.2. Is the sample representative of the target population?                                        |
|                                                                               | 4.3. Are the measurements appropriate?                                                             |

|                  |                                                                                                                         |
|------------------|-------------------------------------------------------------------------------------------------------------------------|
| 5. Mixed methods | 4.4. Is the risk of nonresponse bias low?                                                                               |
|                  | 4.5. Is the statistical analysis appropriate to answer the research question?                                           |
|                  | 5.1. Is there an adequate rationale for using a mixed methods design to address the research question?                  |
|                  | 5.2. Are the different components of the study effectively integrated to answer the research question?                  |
|                  | 5.3. Are the outputs of the integration of qualitative and quantitative components adequately interpreted?              |
|                  | 5.4. Are divergences and inconsistencies between quantitative and qualitative results adequately addressed?             |
|                  | 5.5. Do the different components of the study adhere to the quality criteria of each tradition of the methods involved? |

Table S2. Quality assessment results from Mixed Methods Assessment Tool.

|                       | 1. Qualitative Studies |      |      |      |      | 2. Randomized Controlled Trials |      |      |      |      | 3. Non-Randomized Studies |      |      |      |      | 4. Quantitative Descriptive Studies |      |      |      |      | 5. Mixed Methods Studies |      |      |      |      | Overall Score | Comments                                                                                                                                                                                                                  |
|-----------------------|------------------------|------|------|------|------|---------------------------------|------|------|------|------|---------------------------|------|------|------|------|-------------------------------------|------|------|------|------|--------------------------|------|------|------|------|---------------|---------------------------------------------------------------------------------------------------------------------------------------------------------------------------------------------------------------------------|
|                       | 1.1.                   | 1.2. | 1.3. | 1.4. | 1.5. | 2.1.                            | 2.2. | 2.3. | 2.4. | 2.5. | 3.1.                      | 3.2. | 3.3. | 3.4. | 3.5. | 4.1.                                | 4.2. | 4.3. | 4.4. | 4.5. | 5.1.                     | 5.2. | 5.3. | 5.4. | 5.5. |               |                                                                                                                                                                                                                           |
| Allen et al. (2021)   | Y                      | Y    | Y    | Y    | U    |                                 |      |      |      |      |                           |      |      |      |      |                                     |      |      |      |      |                          |      |      |      |      | 4             | Difficult to tell for 1.4 and 1.5 because the results and discussion are combined, therefore data appears to be minimal, but there are quotes to support findings                                                         |
| Andrews et al. (2019) | Y                      | Y    | U    | U    | U    |                                 |      |      |      |      |                           |      |      |      |      | Y                                   | N    | Y    | N    | Y    | N                        | Y    | Y    | Y    | N    | 2             | 1.3, 1.4, 1.5 no details of thematic analysis approach, data collection, analysis or how themes derived. Quantitative & Qualitative data integrated. 4.3 unvalidated questionnaire but trialled prior to use. 4.4 risk of |



|                              |   |   |   |   |   |  |  |  |  |  |  |  |  |  |  |  |  |  |  |  |  |  |  |  |  |  |  |   |                                                                                                                          |
|------------------------------|---|---|---|---|---|--|--|--|--|--|--|--|--|--|--|--|--|--|--|--|--|--|--|--|--|--|--|---|--------------------------------------------------------------------------------------------------------------------------|
| Lindsey et al. (2022)        | Y | Y | Y | Y | Y |  |  |  |  |  |  |  |  |  |  |  |  |  |  |  |  |  |  |  |  |  |  | 5 | No identifiable issues                                                                                                   |
| Lindsey et al. (2019)        | Y | Y | Y | Y | Y |  |  |  |  |  |  |  |  |  |  |  |  |  |  |  |  |  |  |  |  |  |  | 5 | No identifiable issues                                                                                                   |
| Martin-Biggers et al. (2015) | Y | Y | Y | Y | Y |  |  |  |  |  |  |  |  |  |  |  |  |  |  |  |  |  |  |  |  |  |  | 5 | No identifiable issues. Only qualitative data relevant.                                                                  |
| Penilla et al. (2017)        | Y | Y | Y | Y | Y |  |  |  |  |  |  |  |  |  |  |  |  |  |  |  |  |  |  |  |  |  |  | 5 | No identifiable issues                                                                                                   |
| Pisot (2020)                 | Y | Y | U | U | U |  |  |  |  |  |  |  |  |  |  |  |  |  |  |  |  |  |  |  |  |  |  | 2 | 1.3, 1.4, 1.5 No details on qualitative data analysis or interpretation. mixed method but only qualitative data relevant |
| Roscoe et al. (2017)         | Y | Y | Y | Y | Y |  |  |  |  |  |  |  |  |  |  |  |  |  |  |  |  |  |  |  |  |  |  | 5 | No identifiable issues                                                                                                   |
| Stirrup et al. (2015)        | Y | Y | Y | U | U |  |  |  |  |  |  |  |  |  |  |  |  |  |  |  |  |  |  |  |  |  |  | 3 | Difficult to assess as the methodology definition is unclear. Authors themselves state that data is sparse               |

Y = yes; N = no; U = unclear.
