# Supplementary material for: Mixed-Methods Systematic Review to Identify Facilitators and Barriers for Parents/Carers to Engage Pre-School Children in Community-Based Opportunities to Be Physically Active
Source: MDPI journal article supplement (doi:10.3390/children9111727), 2022-11-10
Supplement: s1 [file s1]

### Database Specific Restrictions

**Bibliographic Database Specific Search Strategies – All run 16<sup>th</sup> May 2022**

<https://www.webofscience.com/wos/woscc/summary/689385a0-7843-4cf0-a9b8-97278eef7fdd-3860f1a3/relevance/1>

- |    |                                                                                                                                                                                                                                                                                                                                                                                                                                                                                                                                                                                                                                                                                                                                                                                                                                                                                                                                                                                                      |
|----|------------------------------------------------------------------------------------------------------------------------------------------------------------------------------------------------------------------------------------------------------------------------------------------------------------------------------------------------------------------------------------------------------------------------------------------------------------------------------------------------------------------------------------------------------------------------------------------------------------------------------------------------------------------------------------------------------------------------------------------------------------------------------------------------------------------------------------------------------------------------------------------------------------------------------------------------------------------------------------------------------|
| #1 | (((((((((((((((TI=(parent*)) OR AB=(parent*)) OR TI=(carer*) OR AB=(carer*) OR TI=(grandparent*) OR<br>AB=(grandparent*) OR TI=(guardian*) OR AB=(guardian*) OR TI=(mother*) OR AB=(mother*) OR<br>TI=(father*) OR AB=(father*) OR TI=(grandfather*) OR AB=(grandfather*) OR TI=(grandmother*) OR<br>AB=(grandmother*)                                                                                                                                                                                                                                                                                                                                                                                                                                                                                                                                                                                                                                                                               |
| #2 | ((((((((((((((((TI=(preschool*) OR AB=(preschool*) OR TI=(pre-school*) OR AB=(pre-school*) OR<br>TI=("preschool-aged") OR AB=(preschool-aged) OR TI=(kindergarten)) OR TI=("early years")) OR AB=("early<br>years")) OR AB=(kindergarten)) OR TI((" early childhood")) OR AB=("early childhood")) OR TI=("young<br>children")) OR AB=("young children")) OR TI=(infants) OR AB=(infants) OR TI=(toddlers) OR AB=(toddlers)<br>OR TI=(babies) OR AB=(babies)                                                                                                                                                                                                                                                                                                                                                                                                                                                                                                                                          |
| #3 | ((((((((((((((((((((((((((((((((((((((((((((((((((((((((((((((((((((((((((((((((((((((((((((((((((((((((((((((((((<br>AB=(facilitator*) OR TI=(enabl*) OR AB=(enabl*) OR TI=(assist*) OR AB=(aassist*) OR TI=(motivat*) OR<br>AB=(motivat*) OR TI=(support*) OR AB=(support*) OR TI=(determin*) OR AB=(determin*) OR TI=(factors))<br>OR AB=(factors)) OR TI=(predict*) OR AB=(predict*) OR TI=(increas*) OR AB=(increas*) OR AB=(decreas*)<br>OR TI=(decreas*) OR TI=(influenc*) OR AB=(influenc*) OR TI=(encourage*) OR AB=(encourage*) OR<br>TI=(correlat*) OR AB=(correlat*) OR TI=(attitude*) OR AB=(attitude*) OR TI=(perception*) OR<br>AB=(perception*) OR TI=(views) OR AB=(views) OR TI=(reasons) OR AB=(reasons) OR TI=(opportunities)<br>OR AB=(opportunities) OR TI=(opinions) OR AB=(opinions) OR TI=(challeng*) OR AB=(challeng*) OR<br>TI=(difficult*) OR AB=(difficult*) OR AB=(prevent*) OR TI=(prevent*) OR TI=(constraint*) OR<br>AB=(constraint*) OR TI=(limit*) OR AB=(limit*) |
| #4 | ((((((((((((((((((((((((((((((((((((((((((((((((((((((((((((((((((((((((((((((((((((((((((((((((((((((((((((((((((<br>AB=(playgroup)) OR TI=("free play")) OR AB=("free play")) OR TI=(free-play)) OR AB=(free-play)) OR<br>TI=("active play")) OR AB=("active play")) OR TI=("fundamental movement")) OR AB=("fundamental<br>movement' )) OR TI=(exercise) OR AB=(exercise) OR TI=(sport) OR AB=(sport) OR TI=("motor skills")) OR                                                                                                                                                                                                                                                                                                                                                                                                                                                                                                                                                                  |

AB=("motor skills")) OR TI=(recreation)) OR AB=(recreation)) OR TI=(" motor competenc\*")) OR AB=("motor competenc\*")) OR TI=(" tummy time")) OR AB=("tummy time")) OR TI=("physical literacy")) OR AB=("physical literacy"))

#5 #1 AND #2 AND #3 AND #4

#6 #1 AND #2 AND #3 AND #4 and 2022 or 2021 or 2020 or 2019 or 2018 or 2017 or 2016 or 2015 (Publication Years)

#7 #1 AND #2 AND #3 AND #4 and 2022 or 2021 or 2020 or 2019 or 2018 or 2017 or 2016 or 2015 (Publication Years) and Articles (Document Types)

#8 #1 AND #2 AND #3 AND #4 and 2022 or 2021 or 2020 or 2019 or 2018 or 2017 or 2016 or 2015 (Publication Years) and English (Languages) and Articles or Early Access (Document Types)

### ProQuest and ASSIA via ProQuest Central

S1 (ti(parent\*) OR ab(parent\*) OR ti(carer\*) OR ab(carer\*) OR ti(grandparent\*) OR ab(grandparent\*) OR ti(guardian\*) OR ab(guardian\*) OR ti(mother\*) OR ab(mother\*))

S2 (ti(father\*) OR ab(father\*) OR ti(grandfather\*) OR ab(grandfather\*) OR ti(grandmother\*) OR ab(grandmother\*))

S3 (ti(preschool\*) OR ab(preschool\*) OR ti(pre-school\*) OR ab(pre-school\*) OR ti(preschool-aged) OR ab(preschool-aged) OR ti(kindergarten) OR ab(kindergarten) OR ti("early years") OR ab("early years"))

S4 (ti("early childhood") OR ab("early childhood") OR ti("young children") OR ab("young children") OR ti(infants) OR ab(infants) OR ti(toddlers) OR ab(toddlers) OR ti(babies) OR ab(babies))

S5 (ti(barrier\*) OR ab(barrier\*) OR ti(facilitator\*) OR ab(facilitator\*) OR ti(enabl\*) OR ab(enabl\*) OR ti(assist\*) OR ab(assist\*) OR ti(motivat\*) OR ab(motivat\*))

S6 (ti(support\*) OR ab(support\*) OR ti(determin\*) OR ab(determin\*) OR ti(factors) OR ab(factors) OR ti(predict\*) OR ab(predict\*) OR ti(increas\*) OR ab(increas\*))

S7 (ti(decreas\*) OR ab(decreas\*) OR ti(influenc\*) OR ab(influenc\*) OR ti(encourage\*) OR ab(encourage\*) OR ti(correlat\*) OR ab(correlat\*) OR ti(attitude\*) OR ab(attitude\*))

S8 (ti(perception\*) OR ab(perception\*) OR ti(views) OR ab(views) OR ti(reasons) OR ab(reasons) OR ti(opportunities) OR ab(opportunities) OR ti(opinions) OR ab(opinions))

S9 (ti(challeng\*) OR ab(challeng\*) OR ti(difficult\*) OR ab(difficult\*) OR ti(prevent\*) OR ab(prevent\*) OR ti(constraint\*) OR ab(constraint\*) OR ti(limit\*) OR ab(limit\*))

S10 (ti("physical activit\*") OR ab("physical activit\*") OR ti(playgroup\*) OR ab(playgroup\*) OR ti("free play") OR ab("free play") OR ti("free-play") OR ab("free-play") OR ti("active play") OR ab("active play"))

S11 (ti("fundamental movement") OR ab("fundamental movement") OR ti(exercise) OR ab(exercise) OR ti(sport) OR ab(sport) OR ti("motor skills") OR ab("motor skills") OR ti(recreation) OR ab(recreation))

S12 (ti("motor competenc\*") OR ab("motor competenc\*") OR ti("lifestyle choices") OR ab("lifestyle choices") OR ti("tummy time") OR ab("tummy time") OR ti("physical literacy") OR ab("physical literacy"))

S13 S1 OR S2

S14 S3 OR S4

S15 S5 OR S6 OR S7 OR S8 OR S9

S16 S10 OR S11 OR S12

S17 S13 AND S14 AND S15 AND S16

Limits (at.exact("Article") AND stype.exact("Scholarly Journals") AND la.exact("ENG") AND pd(20150101-20221231) AND PEER(yes))

**EBSCOhost SPORTDiscus and EBSCOhost CINHAL**

- S1 TI parent\* OR AB parent\* OR TI carer\* OR AB carer\* OR TI grandparent\* OR AB grandparent\* OR TI guardian\* OR AB guardian\* OR TI mother\* OR AB mother\* OR TI father\* OR AB father\* OR TI grandfather\* OR AB grandfather\* OR TI grandmother\* OR AB grandmother\*
- S2 TI preschool\* OR AB preschool\* OR TI pre-school\* OR AB pre-school\* OR TI preschool-aged OR AB preschool-aged OR TI kindergarten OR AB kindergarten OR TI "early years" OR AB "early years" OR TI "early childhood" OR AB "early childhood" OR TI "young children" OR AB "young children" OR TI infants OR AB infants OR TI toddlers OR AB toddlers OR TI babies OR AB babies
- S3 TI barrier\* OR AB barrier\* OR TI facilitator\* OR AB facilitator\* OR TI enabl\* OR AB enabl\* OR TI assist\* OR AB assist\* OR TI motivat\* OR AB motivat\* OR TI support\* OR AB support\* OR TI determin\* OR AB determin\* OR TI factors OR AB factors OR TI predict\* OR AB predict\* OR TI increas\* OR AB increas\* OR TI decreas\* OR AB decreas\* OR TI influenc\* OR AB influenc\* OR TI encourage\* OR AB encourage\* OR TI correlat\* OR AB correlat\* OR TI attitude\* OR AB attitude\* OR TI perception\* OR AB perception\* OR TI views OR AB views OR TI reasons OR AB reasons OR TI opportunities OR AB opportunities OR TI opinions OR AB opinions OR TI challeng\* OR AB challeng\* OR TI difficult\* OR AB difficult\* OR TI prevent\* OR AB prevent\* OR TI constraint\* OR AB constraint\* OR TI limit\* OR AB limit\*
- S4 TI "physical activit\*" OR AB "physical activit\*" OR TI playgroup\* OR AB "playgroup\*" OR TI "free play" OR AB "free play" OR TI "free-play" OR AB "free-play" OR TI "active play" OR AB "active play" OR TI "fundamental movement" OR AB "fundamental movement" OR TI exercise OR AB exercise OR TI sport OR AB sport OR TI "motor skills" OR AB "motor skills" OR TI recreation OR AB recreation OR TI "motor competenc\*" OR AB "motor competenc\*" OR TI "lifestyle choices" OR AB "lifestyle choices" OR TI "tummy time" OR AB "tummy time" OR TI "physical literacy" OR AB "physical literacy"
- S5 S1 AND S2 AND S3 AND S4

**Expanders** - Apply equivalent subjects

**Search modes** - Boolean/Phrase

**Limiters** - Published Date: 20150101-20221231; Publication Type: Academic Journal

**EBSCOhost MEDLINE**

- S1 TI parent\* OR AB parent\* OR TI carer\* OR AB carer\* OR TI grandparent\* OR AB grandparent\* OR TI guardian\* OR AB guardian\* OR TI mother\* OR AB mother\* OR TI father\* OR AB father\* OR TI grandfather\* OR AB grandfather\* OR TI grandmother\* OR AB grandmother\*
- S2 TI preschool\* OR AB preschool\* OR TI pre-school\* OR AB pre-school\* OR TI preschool-aged OR AB preschool-aged OR TI kindergarten OR AB kindergarten OR TI "early years" OR AB "early years" OR TI "early childhood" OR AB "early childhood" OR TI "young children" OR AB "young children" OR TI infants OR AB infants OR TI toddlers OR AB toddlers OR TI babies OR AB babies
- S3 TI barrier\* OR AB barrier\* OR TI facilitator\* OR AB facilitator\* OR TI enabl\* OR AB enabl\* OR TI assist\* OR AB assist\* OR TI motivat\* OR AB motivat\* OR TI support\* OR AB support\* OR TI determin\* OR AB determin\* OR TI factors OR AB factors OR TI predict\* OR AB predict\* OR TI increas\* OR AB increas\* OR TI decreas\* OR AB decreas\* OR TI influenc\* OR AB influenc\* OR TI encourage\* OR AB encourage\* OR TI correlat\* OR AB correlat\* OR TI attitude\* OR AB attitude\* OR TI perception\* OR AB perception\* OR TI views OR AB views OR TI reasons OR AB reasons OR TI opportunities OR AB opportunities OR TI opinions OR AB opinions OR TI challeng\* OR

AB challeng\* OR TI difficult\* OR AB difficult\* OR TI prevent\* OR AB prevent\* OR TI constraint\* OR AB constraint\* OR TI limit\* OR AB limit\*

S4 TI "physical activit\*" OR AB "physical activit\*" OR TI playgroup\* OR AB "playgroup\*" OR TI "free play" OR AB "free play" OR TI "free-play" OR AB "free-play" OR TI " active play" OR AB "active play" OR TI "fundamental movement" OR AB "fundamental movement" OR TI exercise OR AB exercise OR TI sport OR AB sport OR TI "motor skills" OR AB " motor skills" OR TI recreation OR AB recreation OR TI "motor competenc\*" OR AB "motor competenc\*" OR TI "lifestyle choices" OR AB "lifestyle choices" OR TI "tummy time" OR AB "tummy time" OR TI "physical literacy" OR AB " physical literacy"

S5 S1 AND S2 AND S3 AND S4

**Limiters** - Scholarly (Peer Reviewed) Journals; Date of Publication: 20150101-20221231

**Expanders** - Apply equivalent subjects

**Search modes** - Boolean/Phrase

### **Secondary and Grey Literature Searching**

- Google Advance Search and an identified list of topic specific websites were searched for grey literature; full text articles retrieved were hand searched via reference checking and forward and backwards citation screening/snowballing, and members of the wider review team from Sport Wales and Local Councils in Wales were contacted to identify any additional studies.

### **Google Advanced Search**

Tuesday 31<sup>st</sup> May 12:20pm

*All of these words:* physical activity

*Any of these words:* "early years", "young children", preschool, "physical literacy", "early childhood", "active play", sport, exercise, toddlers, infants

### **Limiters**

*Language:* English

Search run with and without limiting *region* to: "United Kingdom"
