# Supplementary material for: Mixed-Methods Systematic Review to Identify Facilitators and Barriers for Parents/Carers to Engage Pre-School Children in Community-Based Opportunities to Be Physically Active
Source: Children (Basel). 2022 Nov 10;9(11):1727. doi: 10.3390/children9111727 (PMC9688361; doi:10.3390/children9111727)
Supplement: Supplementary file 1 [file children-09-01727-s001.zip]

Archive with 5 entries (5 files):
- children-2002427-supplementary1.pdf
- children-2002427-supplementary2.pdf
- File S1.pdf
- File S2.pdf
- Table S1and S2.pdf
